# Supplementary material for: Contextual Factors Influencing Physicians’ Perception of Antibiotic Prescribing in Primary Care in Germany - A Prospective Observational Study
Source: Research Square preprint supplement (doi:10.21203/rs.3.rs-674135/v2), 2021-07-27
Supplement: Supplementary file 1 [file 4cfc55d7a59db80dcd15b4ee.pdf]

## Additional file 1

### Translated Overview of all relevant questions

| <b>Contextual factors</b>                                                                 |                              |                          |                          |                          |                           |
|-------------------------------------------------------------------------------------------|------------------------------|--------------------------|--------------------------|--------------------------|---------------------------|
| <b>Structural conditions<br/>(team, rooms)</b>                                            | <b>Strongly<br/>disagree</b> | <b>Disagree</b>          | <b>Neutral</b>           | <b>Agree</b>             | <b>Strongly<br/>agree</b> |
| ... motivate me to treat patients increasingly guideline-based                            | <input type="checkbox"/>     | <input type="checkbox"/> | <input type="checkbox"/> | <input type="checkbox"/> | <input type="checkbox"/>  |
| ... support me in taking shared therapy decisions with the patients                       | <input type="checkbox"/>     | <input type="checkbox"/> | <input type="checkbox"/> | <input type="checkbox"/> | <input type="checkbox"/>  |
| ... support me in handling patient expectations regarding the prescription of antibiotics | <input type="checkbox"/>     | <input type="checkbox"/> | <input type="checkbox"/> | <input type="checkbox"/> | <input type="checkbox"/>  |
| ... are helpful when implementing new routines in the practice                            | <input type="checkbox"/>     | <input type="checkbox"/> | <input type="checkbox"/> | <input type="checkbox"/> | <input type="checkbox"/>  |
| ... impact the amount of time available to me per patient                                 | <input type="checkbox"/>     | <input type="checkbox"/> | <input type="checkbox"/> | <input type="checkbox"/> | <input type="checkbox"/>  |
| ... impact my decision to prescribe antibiotics                                           | <input type="checkbox"/>     | <input type="checkbox"/> | <input type="checkbox"/> | <input type="checkbox"/> | <input type="checkbox"/>  |

| <b>Existing processes and<br/>organizing processes in<br/>the practice ...</b> | <b>Strongly<br/>disagree</b> | <b>Disagree</b>          | <b>Neutral</b>           | <b>Agree</b>             | <b>Strongly<br/>agree</b> |
|--------------------------------------------------------------------------------|------------------------------|--------------------------|--------------------------|--------------------------|---------------------------|
| ... motivate guideline-oriented patient care                                   | <input type="checkbox"/>     | <input type="checkbox"/> | <input type="checkbox"/> | <input type="checkbox"/> | <input type="checkbox"/>  |
| ... support me in taking a shared the therapy decision with the patients       | <input type="checkbox"/>     | <input type="checkbox"/> | <input type="checkbox"/> | <input type="checkbox"/> | <input type="checkbox"/>  |
| ... supports me in managing patient expectations regarding the                 | <input type="checkbox"/>     | <input type="checkbox"/> | <input type="checkbox"/> | <input type="checkbox"/> | <input type="checkbox"/>  |

|                                                                |                          |                          |                          |                          |                          |
|----------------------------------------------------------------|--------------------------|--------------------------|--------------------------|--------------------------|--------------------------|
| prescription of antibiotics                                    |                          |                          |                          |                          |                          |
| ... are helpful with implementing new routines in the practice | <input type="checkbox"/> |
| ... impact the amount of time available to me per patient      | <input type="checkbox"/> |
| ... impact my decision to prescribe antibiotics                | <input type="checkbox"/> |

| <b>External defined general conditions...</b>                                              | <b>Strongly disagree</b> | <b>Disagree</b>          | <b>Neutral</b>           | <b>Agree</b>             | <b>Strongly agree</b>    |
|--------------------------------------------------------------------------------------------|--------------------------|--------------------------|--------------------------|--------------------------|--------------------------|
| ... motivate guideline-oriented patient care                                               | <input type="checkbox"/> |
| ... support me in taking a shared the therapy decision with the patients                   | <input type="checkbox"/> |
| ... supports me in managing patient expectations regarding the prescription of antibiotics | <input type="checkbox"/> |
| ... are helpful with implementing new routines in the practice                             | <input type="checkbox"/> |
| ... impact the amount of time available to me per patient                                  | <input type="checkbox"/> |
| ... impact my decision to prescribe antibiotics                                            | <input type="checkbox"/> |

| <b>Participating in the network ...</b>       | <b>Strongly disagree</b> | <b>Disagree</b>          | <b>Neutral</b>           | <b>Agree</b>             | <b>Strongly agree</b>    |
|-----------------------------------------------|--------------------------|--------------------------|--------------------------|--------------------------|--------------------------|
| ... motivates guideline-oriented patient care | <input type="checkbox"/> |
| ... supports shared-decision making           | <input type="checkbox"/> |

|                                                                                      |                          |                          |                          |                          |                          |
|--------------------------------------------------------------------------------------|--------------------------|--------------------------|--------------------------|--------------------------|--------------------------|
| ... supports managing patient expectations regarding the prescription on antibiotics | <input type="checkbox"/> |
| ... supports implementing new routines                                               | <input type="checkbox"/> |
| ... has an impact on my antibiotic prescribing decisions                             | <input type="checkbox"/> |

| <b>In my primary care network</b>                                                             | <b>Strongly disagree</b> | <b>Disagree</b>          | <b>Neutral</b>           | <b>Agree</b>             | <b>Strongly agree</b>    |
|-----------------------------------------------------------------------------------------------|--------------------------|--------------------------|--------------------------|--------------------------|--------------------------|
| ... antibiotics therapy is discussed                                                          | <input type="checkbox"/> |
| ... peer exchange about guideline-oriented antibiotics therapy is offered                     | <input type="checkbox"/> |
| ... exchange about antibiotic prescribing routines for non-complicated infections is possible | <input type="checkbox"/> |
| ... there are conventions about antibiotics for non-complicated infections                    | <input type="checkbox"/> |
| ... training on guideline-oriented antibiotics therapy is offered                             | <input type="checkbox"/> |
| ... I participated in training on guideline-oriented antibiotics therapy                      | <input type="checkbox"/> |

### General information about person and medical practice

|                     |                                                                                                                |
|---------------------|----------------------------------------------------------------------------------------------------------------|
| Your year of birth? | <input type="text"/> <input type="text"/> <input type="text"/> <input type="text"/> (Please enter a year here) |
| Sex?                | <input type="checkbox"/> female <input type="checkbox"/> male                                                  |

|                                                                       |                                                                                                                                                                                                                                                                                   |
|-----------------------------------------------------------------------|-----------------------------------------------------------------------------------------------------------------------------------------------------------------------------------------------------------------------------------------------------------------------------------|
| Your medical specialty?                                               | _____<br>_____                                                                                                                                                                                                                                                                    |
| How many professional years of experience as a physician do you have? | ca. <input type="text"/> <input type="text"/> <input type="text"/> years                                                                                                                                                                                                          |
| Your employment status?                                               | <input type="checkbox"/> full-time <input type="checkbox"/> self-employed<br><input type="checkbox"/> part-time <input type="checkbox"/> employed                                                                                                                                 |
| What is the size of the community where your practice is located?     | <input type="checkbox"/> < 5.000 inhabitants<br><input type="checkbox"/> 5.000 to under 20.000 inhabitants<br><input type="checkbox"/> 20.000 to under 100.000<br><input type="checkbox"/> 100.000 to under 500.000 inhabitants<br><input type="checkbox"/> > 500.000 inhabitants |
| In which type pf practice are you working?                            | <input type="checkbox"/> single practice <input type="checkbox"/> shared rooms<br><input type="checkbox"/> group practice <input type="checkbox"/> medical center                                                                                                                 |
| How many patients do you see per quarter of year on average?          | <input type="checkbox"/> < 500 <input type="checkbox"/> 1.001-1.500<br><input type="checkbox"/> 500-1.000 <input type="checkbox"/> > 1.500                                                                                                                                        |
