# Supplementary material for: Contextual Factors Influencing Physicians’ Perception of Antibiotic Prescribing in Primary Care in Germany - A Prospective Observational Study
Source: Research Square preprint supplement (doi:10.21203/rs.3.rs-674135/v2), 2021-07-27
Supplement: Supplementary file 2 [file 35094736de48b542cc114bee.docx]

**Additional file 4**

**Results intervention arm comparison**

| **Variables** | **Test** | **P value** | |
| --- | --- | --- | --- |
| **PIP-ARena** |  |  | |
| PIP-ARena | 0.076 **a** | 0.963 | |
| **Individual characteristics** | |  | |
| Sex | 5.245 **a** | 0.073 | |
| Work experience | 1.320 **b** | 0.517 | |
| Medical speciality | 0.210 **a** | 0.900 | |
| **PCN environment** | |  | |
| PCN environment | 6.499 **b** | 0.039 | |
| **General characteristics of medical practice** | |  | |
| Number of patients per quarter of year | 0.297 **a** | 0.862 | |
| Practice area | 66.251 **a** | < 0.001 | |
| Structural conditions | 0.360 **b** | 0.835 | |
| Environment of existing processes | 0.510 **b** | 0.775 | |
| External defined general conditions | 0.383 **b** | 0.826 | |
| **a**= Chi2 |  |  |  |
| **b**= Kruskal-Wallis Test  PIP-ARena = perceived impact of participation in the ARena project on the decision-making regarding antibiotic prescribing | | | |
