# Supplementary material for: Contextual Factors Influencing Physicians’ Perception of Antibiotic Prescribing in Primary Care in Germany - A Prospective Observational Study
Source: Research Square preprint supplement (doi:10.21203/rs.3.rs-674135/v2), 2021-07-27
Supplement: Supplementary file 2 [file ee59b921af68c1692c3a6392.pdf]

## Additional file 2

### Overview and Reliability of the mean score variables

#### a. PCN environment

##### *Reliability Statistics*

| Cronbach's Alpha | N of Items | N   |
|------------------|------------|-----|
| 0.898            | 11         | 224 |

##### *Item-Total Statistics*

|                                                                                               | Scale Mean if Item Deleted | Scale Variance if Item Deleted | Corrected Item-Total Correlation | Cronbach's Alpha if Item Deleted |
|-----------------------------------------------------------------------------------------------|----------------------------|--------------------------------|----------------------------------|----------------------------------|
| <b>Participating in the network ...</b>                                                       |                            |                                |                                  |                                  |
| ... motivates guideline-oriented patient care                                                 | 39.38                      | 52.51                          | 0.73                             | 0.882                            |
| ... supports shared-decision making                                                           | 39.64                      | 51.63                          | 0.71                             | 0.883                            |
| ... supports managing patient expectations regarding the prescription on antibiotics          | 39.63                      | 52.02                          | 0.71                             | 0.884                            |
| ... supports implementing new routines                                                        | 39.31                      | 53.08                          | 0.69                             | 0.885                            |
| ... has an impact on my antibiotic prescribing decisions                                      | 40.13                      | 52.30                          | 0.58                             | 0.894                            |
| <b>In my primary care network</b>                                                             |                            |                                |                                  |                                  |
| ... antibiotics therapy is discussed                                                          | 38.74                      | 58.99                          | 0.48                             | 0.896                            |
| ... peer exchange about guideline-oriented antibiotics therapy is offered                     | 39.07                      | 55.54                          | 0.65                             | 0.888                            |
| ... exchange about antibiotic prescribing routines for non-complicated infections is possible | 39.24                      | 54.52                          | 0.63                             | 0.888                            |
| ... there are conventions about antibiotics for non-complicated infections                    | 39.38                      | 53.20                          | 0.65                             | 0.887                            |
| ... training on guideline-oriented antibiotics therapy is offered                             | 38.76                      | 57.55                          | 0.54                             | 0.893                            |
| ... I participated in training on guideline-oriented antibiotics therapy                      | 38.81                      | 56.70                          | 0.57                             | 0.892                            |

**b. Structural conditions**

*Reliability Statistics*

| <b>Cronbach's Alpha</b> | <b>N of Items</b> | <b>N</b> |
|-------------------------|-------------------|----------|
| 0.921                   | 6                 | 221      |

*Item-Total Statistics*

| <b>Structural conditions (teams, rooms)</b>                                               | <b>Scale Mean if Item Deleted</b> | <b>Scale Variance if Item Deleted</b> | <b>Corrected Item-Toal Correlation</b> | <b>Cronbach's Alpha if Item Deleted</b> |
|-------------------------------------------------------------------------------------------|-----------------------------------|---------------------------------------|----------------------------------------|-----------------------------------------|
| ... motivate me to treat patients increasingly guideline-based                            | 14.61                             | 29.49                                 | 0.82                                   | 0.901                                   |
| ... support me in taking shared therapy decisions with the patients                       | 14.48                             | 29.25                                 | 0.87                                   | 0.893                                   |
| ... support me in handling patient expectations regarding the prescription of antibiotics | 14.53                             | 29.33                                 | 0.89                                   | 0.891                                   |
| ... are helpful when implementing new routines in the practice                            | 14.12                             | 31.68                                 | 0.75                                   | 0.910                                   |
| ... impact the amount of time available to me per patient                                 | 14.18                             | 32.82                                 | 0.61                                   | 0.929                                   |
| ... impact my decision to prescribe antibiotics                                           | 15.06                             | 31.24                                 | 0.72                                   | 0.915                                   |

**c. Environment of existing processes**

*Reliability Statistics*

| <b>Cronbach's Alpha</b> | <b>N of Items</b> | <b>N</b> |
|-------------------------|-------------------|----------|
| 0.907                   | 6                 | 224      |

*Item-Total Statistics*

| <b>Existing processes and organizing processes in the practice ...</b> | <b>Scale Mean if</b> | <b>Scale Variance if</b> | <b>Corrected Item-Toal</b> | <b>Cronbach's Alpha if</b> |
|------------------------------------------------------------------------|----------------------|--------------------------|----------------------------|----------------------------|
|------------------------------------------------------------------------|----------------------|--------------------------|----------------------------|----------------------------|

|                                                                                            | <b>Item Deleted</b> | <b>Item Deleted</b> | <b>Correlation</b> | <b>Item Deleted</b> |
|--------------------------------------------------------------------------------------------|---------------------|---------------------|--------------------|---------------------|
| ... motivate guideline-oriented patient care                                               | 16.43               | 23.35               | 0.82               | 0.879               |
| ... support me in taking a shared the therapy decision with the patients                   | 16.29               | 23.73               | 0.85               | 0.875               |
| ... supports me in managing patient expectations regarding the prescription of antibiotics | 16.42               | 23.44               | 0.86               | 0.873               |
| ... are helpful with implementing new routines in the practice                             | 16.06               | 25.39               | 0.72               | 0.894               |
| ... impact the amount of time available to me per patient                                  | 16.16               | 25.78               | 0.56               | 0.917               |
| ... impact my decision to prescribe antibiotics                                            | 17.04               | 23.67               | 0.69               | 0.900               |

#### **d. External defined general conditions**

##### *Reliability Statistics*

| <b>Cronbach's Alpha</b> | <b>N of Items</b> | <b>N</b> |
|-------------------------|-------------------|----------|
| 0.890                   | 6                 | 224      |

##### *Item-Total Statistics*

| <b>External defined general conditions...</b>                                              | <b>Scale Mean if Item Deleted</b> | <b>Scale Variance if Item Deleted</b> | <b>Corrected Item-Total Correlation</b> | <b>Cronbach's Alpha if Item Deleted</b> |
|--------------------------------------------------------------------------------------------|-----------------------------------|---------------------------------------|-----------------------------------------|-----------------------------------------|
| ... motivate guideline-oriented patient care                                               | 13.16                             | 22.41                                 | 0.74                                    | 0.865                                   |
| ... support me in taking a shared the therapy decision with the patients                   | 13.35                             | 21.30                                 | 0.83                                    | 0.851                                   |
| ... supports me in managing patient expectations regarding the prescription of antibiotics | 13.4                              | 21.29                                 | 0.84                                    | 0.849                                   |
| ... are helpful with implementing new                                                      | 13.34                             | 22.24                                 | 0.76                                    | 0.863                                   |

|                                                              |       |       |      |       |
|--------------------------------------------------------------|-------|-------|------|-------|
| routines in the practice                                     |       |       |      |       |
| ... impact the amount of time available<br>to me per patient | 13.22 | 25.21 | 0.35 | 0.930 |
| ... impact my decision to prescribe<br>antibiotics           | 13.62 | 21.47 | 0.80 | 0.857 |
